# Supplementary material for: Suppressive Effects of Gelsemine on Anxiety-like Behaviors Induced by Chronic Unpredictable Mild Stress in Mice
Source: MDPI journal article supplement (doi:10.3390/brainsci12020191), 2022-01-30
Supplement: s1 [file s1]

# Suppressive effects of gelsemine on anxiety-like behaviors induced by chronic unpredictable mild stress in mice

Hui Yu<sup>1,2</sup>, Mo-Huan Tang<sup>1,2</sup>, Zi-Yue Zeng<sup>1,2</sup>, Si-Juan Huang<sup>1,2</sup>, Xiaofeng Zheng<sup>1\*</sup>, Zhao-Ying Liu<sup>2\*</sup>

<sup>1</sup> *College of Veterinary Medicine, Hunan Agricultural University, Changsha, 410128, China*

<sup>2</sup> *Hunan Engineering Technology Research Center of Veterinary Drugs, Hunan Agricultural University, Changsha, 410128, China*

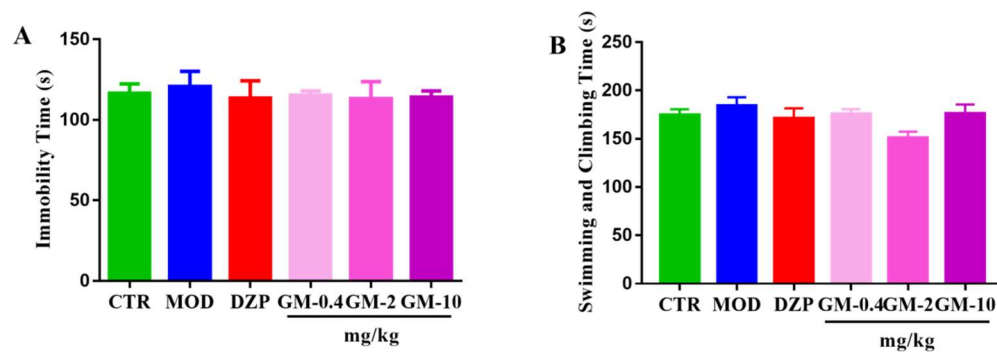

**Figure S1.** The immobility time and swimming and climbing time were measured in FST on day 27 (A-B, respectively). Mice were exposed to stress (subjected to CUMS) and daily treated with saline, gelsemine (GM, 0.4, 2.0 and 10.0 mg/kg, i.p.), diazepam (DZP, 1.0 mg/kg, i.p.) before test for 9 days. Data are presented as means the  $\pm$  SEM (n=12) .

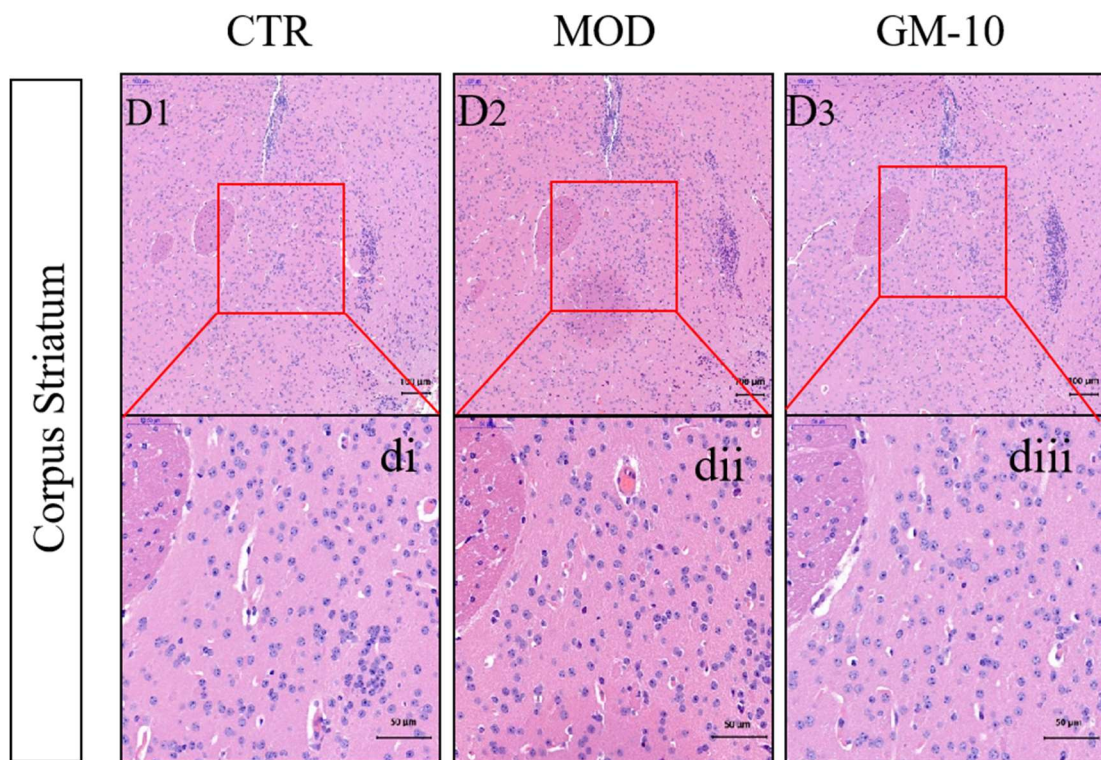

**Figure S2.** Effect of Gelsemine on the pathomorphology of Corpus striatum in mice. D1 represent the control group, D2 represent the model group, D3 represent the 10mg/kg Gelsemine - treated group, respectively ( $\times 100$  magnification); di-diii represent the same group with  $\times 400$  magnification.
